# Supplementary material
Source: PubMed Central journal article supplement (PMC10964984)
Supplement: NIHMS1936276-supplement-5.pdf [file NIHMS1936276-supplement-5.pdf]

## Tables

**Table S1: Antigenic data. Related to Figure 1.**

We list neutralisation titers,  $T_i^k$ , of strains from variant  $i$  assayed against human antisera induced by primary immunisation (infection or vaccination) with strains of variant  $k$  (columns). Numbers are computed from average values of titer drops ( $\Delta T_i^k = T_*^k - T_i^k$ ) of primary data from refs. [3, 7, 8, 29, 30, 32, 52, 53, 71, 85, 85, 88, 90]; see Table S4. Where no primary data is available, titer drops are inferred by symmetry or (as lower bounds) by genetic similarity (numbers in italics, Methods). Absolute titers  $T_i^k$  are shifted by the reference titers  $T_*^k = 6.5$ , ( $k = \text{Alpha, Delta, BA.1, BA.2, BA.4/5}$ ),  $T_*^{\text{vac}} = 7.8$ ,  $T_*^{\text{bst}} = T_*^{\text{biv}} = 9.8$  obtained from refs. [8, 9, 52, 93]; see Methods and Figure 1D.

|        | Alpha | Delta | BA.1  | BA.2  | BA.4/5 | vac   | bst   | biv   |
|--------|-------|-------|-------|-------|--------|-------|-------|-------|
| Alpha  | 6.6   | 4.7   | < 2.2 | < 2.2 | < 2.2  | 7.0   | < 9.0 | < 9.0 |
| Delta  | 5.0   | 6.6   | < 1.8 | < 1.8 | < 1.8  | 6.1   | 8.3   | < 8.3 |
| BA.1   | 1.5   | 1.8   | 6.6   | 4.7   | 5.3    | 2.2   | 7.1   | 7.1   |
| BA.2   | < 1.5 | < 1.8 | 5.3   | 6.6   | 7.3    | < 2.2 | 7.4   | 10.5  |
| BA.4/5 | < 1.5 | < 1.8 | 4.0   | 5.2   | 6.6    | < 2.2 | 6.4   | 9.8   |
| BA.4.6 | < 1.5 | < 1.8 | < 3.0 | < 4.2 | 5.8    | < 2.2 | 6.2   | 9.4   |
| BA.5.9 | < 1.5 | < 1.8 | < 3.0 | < 4.2 | 5.3    | < 2.2 | 6.6   | 9.4   |
| BQ.1.1 | < 1.5 | < 1.8 | 1.6   | 2.9   | 4.3    | < 2.2 | 4.3   | 7.3   |
| XBB    | < 1.5 | < 1.8 | 1.3   | 1.6   | 3.0    | < 2.2 | 4.4   | 6.6   |
| BF.7   | < 1.5 | < 1.8 | 2.9   | 3.7   | 5.3    | < 2.2 | 5.9   | 9.5   |
| BM.1.1 | < 1.5 | < 1.8 | 1.9   | 2.3   | 3.1    | < 2.2 | 4.9   | < 7.8 |
| BN.1   | < 1.5 | < 1.8 | 3.2   | 3.0   | 3.4    | < 2.2 | 5.2   | < 7.8 |
| CH.1   | < 1.5 | < 1.8 | 1.5   | 1.7   | 2.7    | < 2.2 | 3.6   | 5.7   |

**Table S2: Ranking of fitness models. Related to Figure 3.**

We compare the full fitness model used in the main text (VAC+INF: vaccination + infection + intrinsic selection) with partial models (INF: infection + intrinsic selection, VAC: vaccination + intrinsic selection), and a null model (0: intrinsic selection only). Columns from left to right: vaccination parameter,  $\gamma_{\text{vac}}$ , ML values with 95% confidence intervals ( $\gamma_1$  for Alpha–Delta,  $\gamma_2$  for all later shifts); infection weight parameter,  $b$ , ML values with 95% confidence intervals ( $b_1$  for shifts up to BA.2,  $b_2$  for BA.2–BA.4/5,  $b_3$  for BA.4/5–BQ.1); log likelihood score difference to the null model,  $\Delta L$ ; BIC score difference to the null model,  $\Delta H$ . The likelihood scores are reported separately for the early shifts (1 to BA.1) and for all shifts (1 to BQ.1).

| model   | antigenic parameters |                 |               |               |               | scores (early shifts) |            | scores (all shifts) |            |
|---------|----------------------|-----------------|---------------|---------------|---------------|-----------------------|------------|---------------------|------------|
|         | $\gamma_1$           | $\gamma_2$      | $b_1$         | $b_2$         | $b_3$         | $\Delta L$            | $\Delta H$ | $\Delta L$          | $\Delta H$ |
| VAC+INF | $1.22 \pm 0.03$      | $0.28 \pm 0.01$ | $2.4 \pm 0.5$ | $5.6 \pm 1.0$ | $6.4 \pm 1.0$ | 950                   | -1883      | 1830                | -3638      |
| INF     | 9.7                  | -               | 0.11          | 0.26          | 0.3           | 392                   | -773       | 1255                | -2492      |
| VAC     | 1.22                 | 0.42            | -             | -             | -             | 876                   | -1741      | -3826               | 7662       |
| 0       | -                    | -               | -             | -             | -             | 0                     | 0          | 0                   | 0          |

**Table S3: Intrinsic and antigenic selection components. Related to Figure 3.**

Selection coefficients between the invading and the ancestral variant,  $s = f_{\text{inv}} - f_{\text{anc}}$ , and their decomposition into antigenic and intrinsic components are inferred for the full fitness model; all values are time averages for each clade shift. Rows from top to bottom: major clade shifts from 1 to BQ.1. Columns from left to right: average antigenic selection in immune classes of infection ( $k = \text{Alpha, ..., BA.4/5}$ ) and vaccination ( $k = \text{vac, bst, biv}$ ); intrinsic selection ( $s_0$ ); total selection ( $s$ ). Selection coefficients are given in units [ $10^{-2}\text{d}^{-1}$ ]; the symbol “<” marks values  $s < 0.01\text{d}^{-1}$ . We list ML values with 95% confidence intervals (for selection components) or with rms cross-region variation of selection (for the total selection,  $s$ ).

| clade shift | selection coefficients |            |             |            |            |           |             |     |            |            |
|-------------|------------------------|------------|-------------|------------|------------|-----------|-------------|-----|------------|------------|
|             | Alpha                  | Delta      | BA.1        | BA.2       | BA.4/5     | vac       | bst         | biv | $s_0$      | $s$        |
| 1–Alpha     | <                      | -          | -           | -          | -          | <         | -           | -   | $8 \pm .1$ | $8 \pm 1$  |
| Alpha–Delta | $1 \pm .1$             | <          | -           | -          | -          | -         | $4 \pm .2$  | -   | $4 \pm .2$ | $9 \pm 2$  |
| Delta–BA.1  | <                      | $2 \pm .6$ | $-1 \pm .2$ | -          | -          | $6 \pm 1$ | $-1 \pm .2$ | -   | $6 \pm 1$  | $13 \pm 2$ |
| BA.1–BA.2   | <                      | <          | $1 \pm .4$  | <          | -          | <         | $-1 \pm .5$ | -   | $8 \pm .2$ | $8 \pm 1$  |
| BA.2–BA.4/5 | <                      | <          | $3 \pm .2$  | $3 \pm .2$ | <          | <         | $3 \pm .6$  | -   | <          | $8 \pm 1$  |
| BA.4/5–BQ.1 | <                      | <          | <           | $1 \pm .2$ | $2 \pm .2$ | <         | $1 \pm .5$  | <   | <          | $5 \pm .3$ |
