# Supplementary material
Source: PubMed Central journal article supplement (PMC10964984)

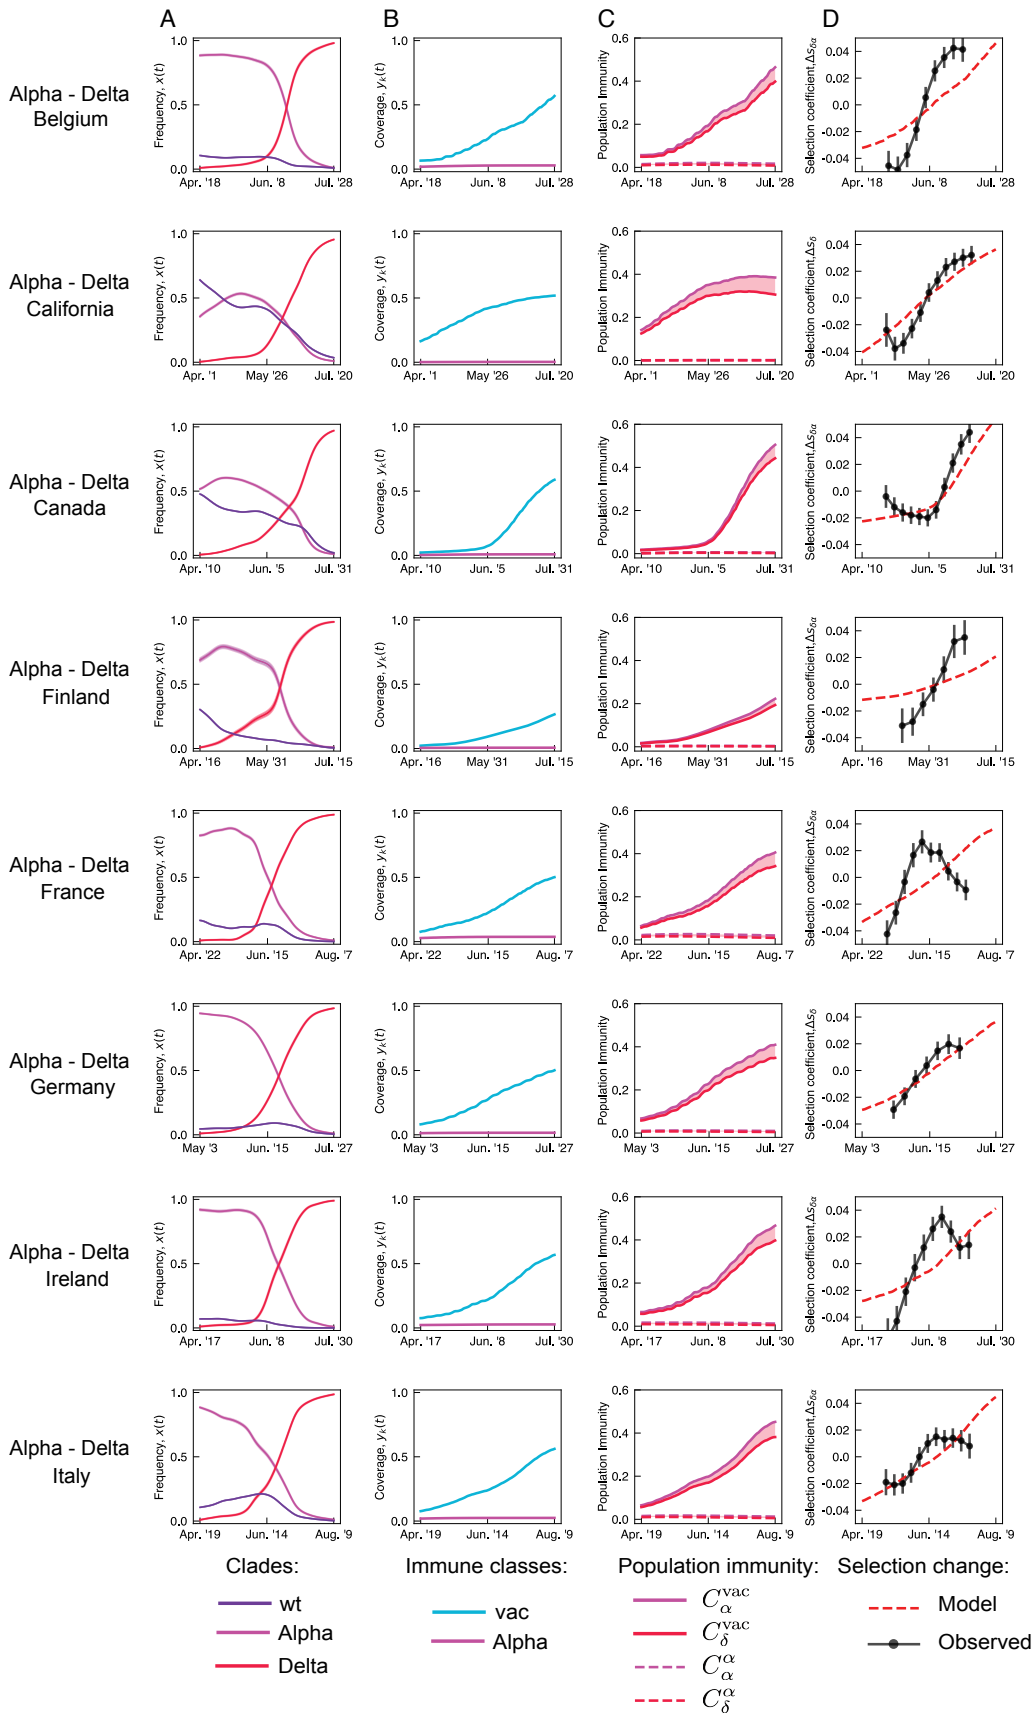

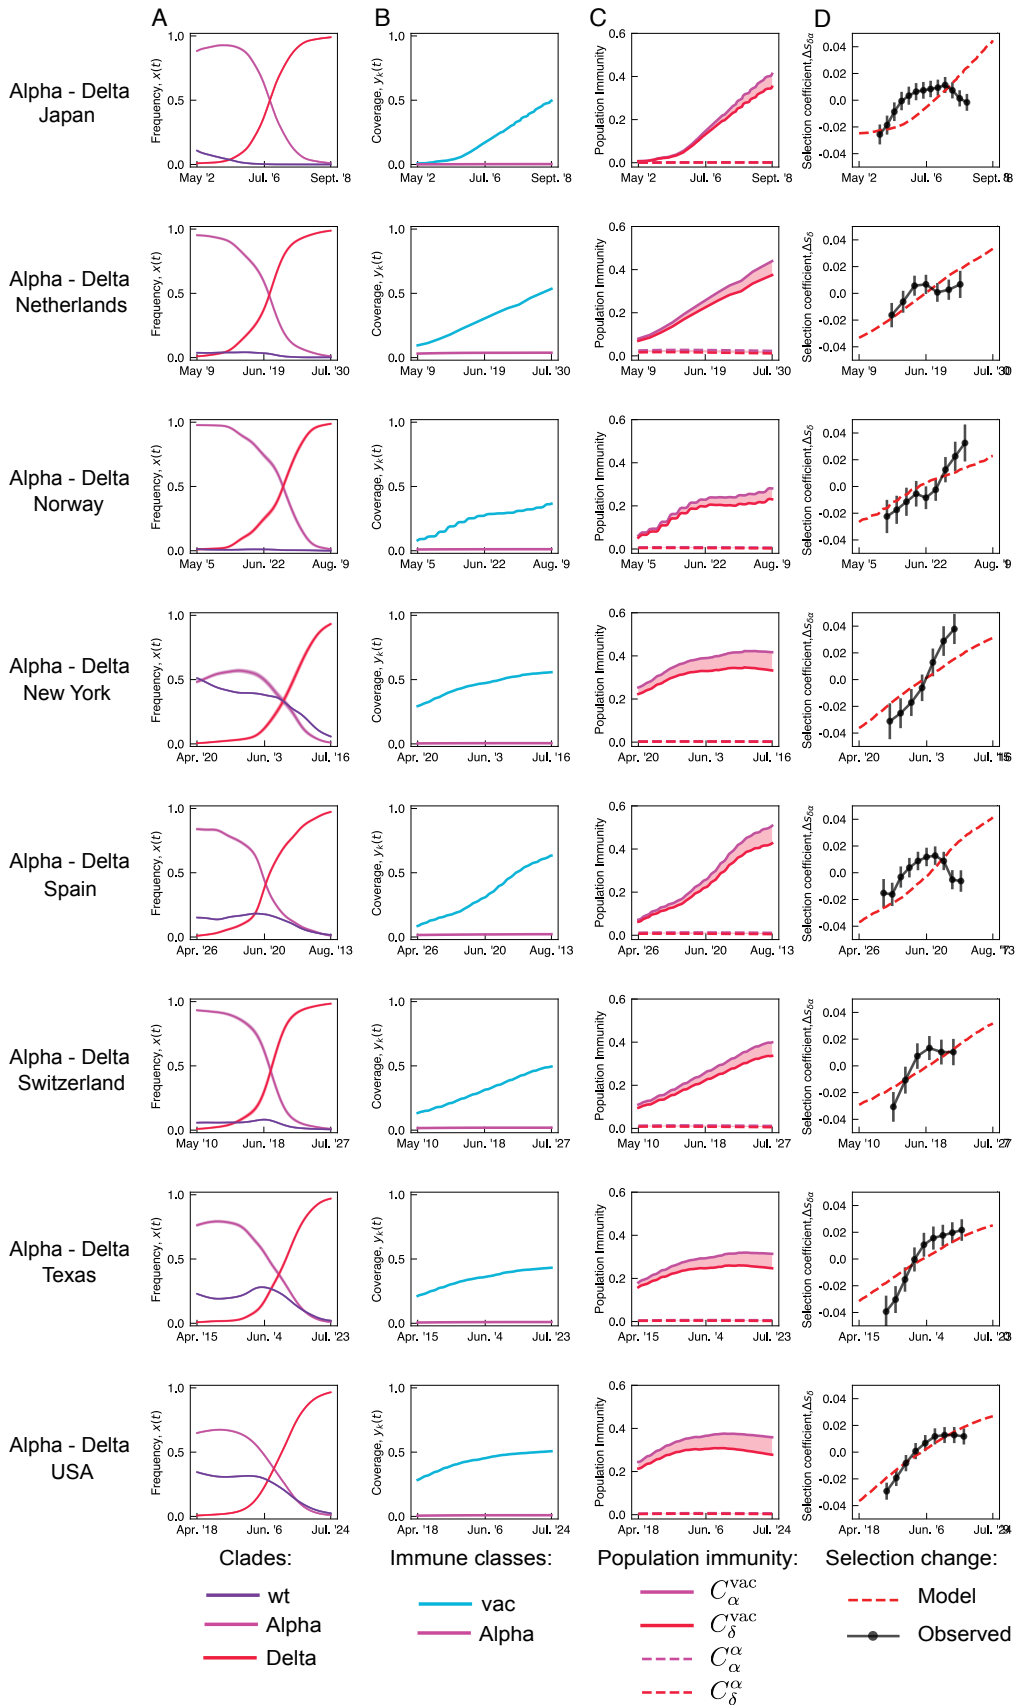

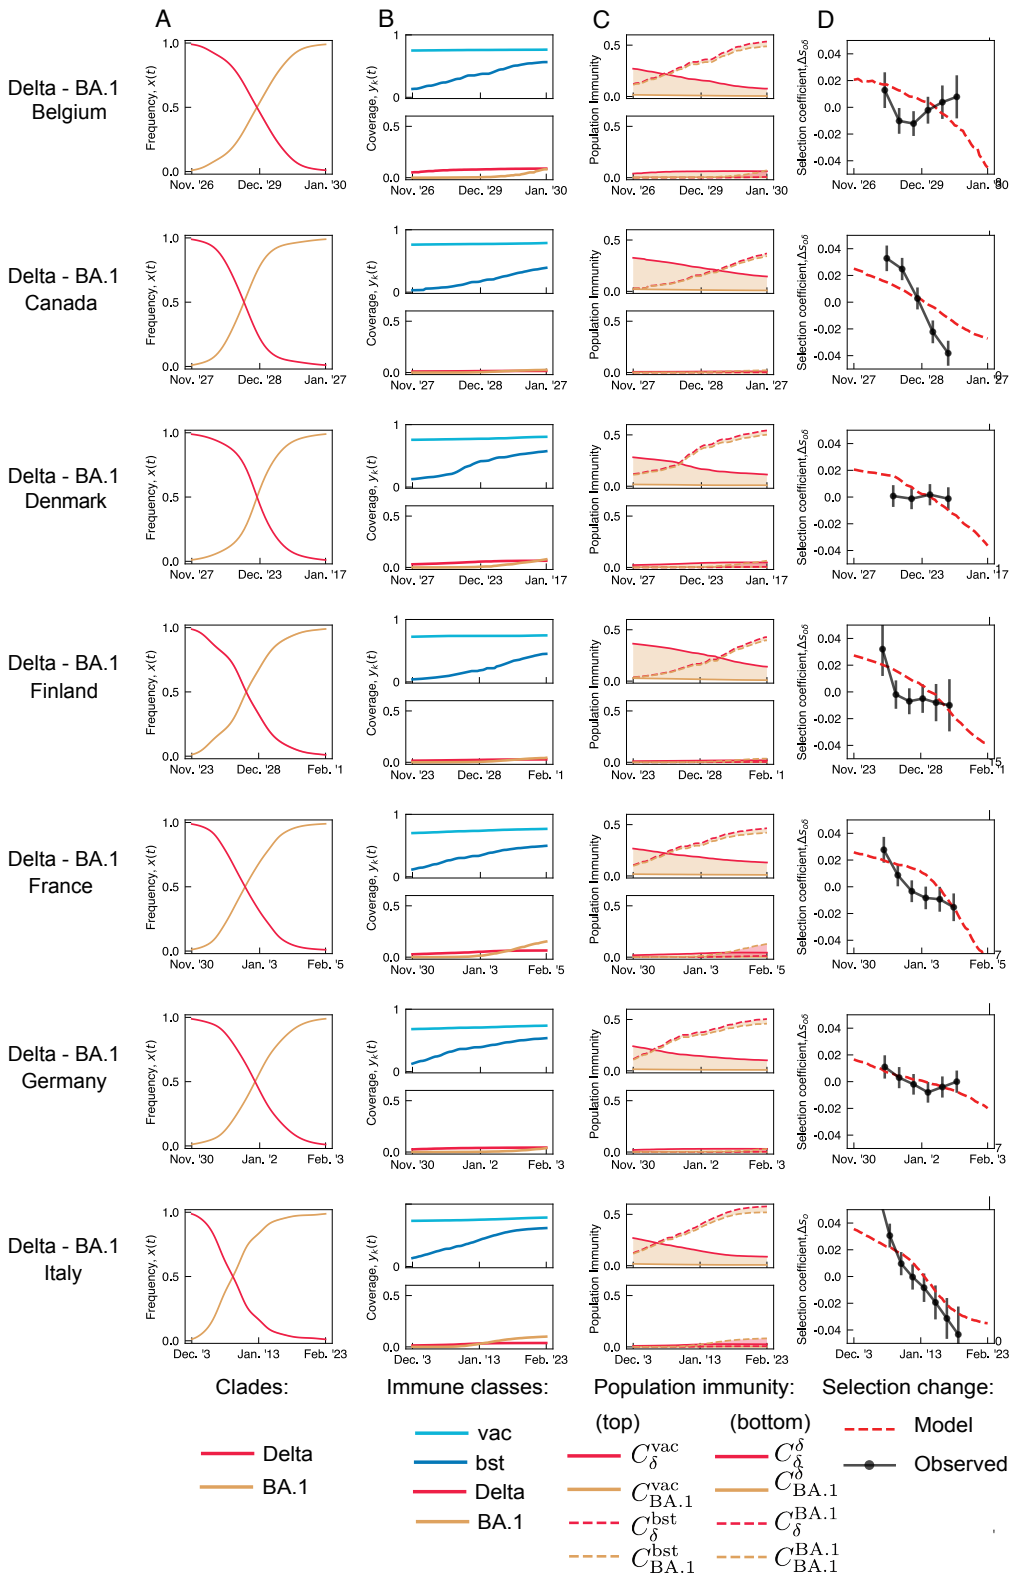

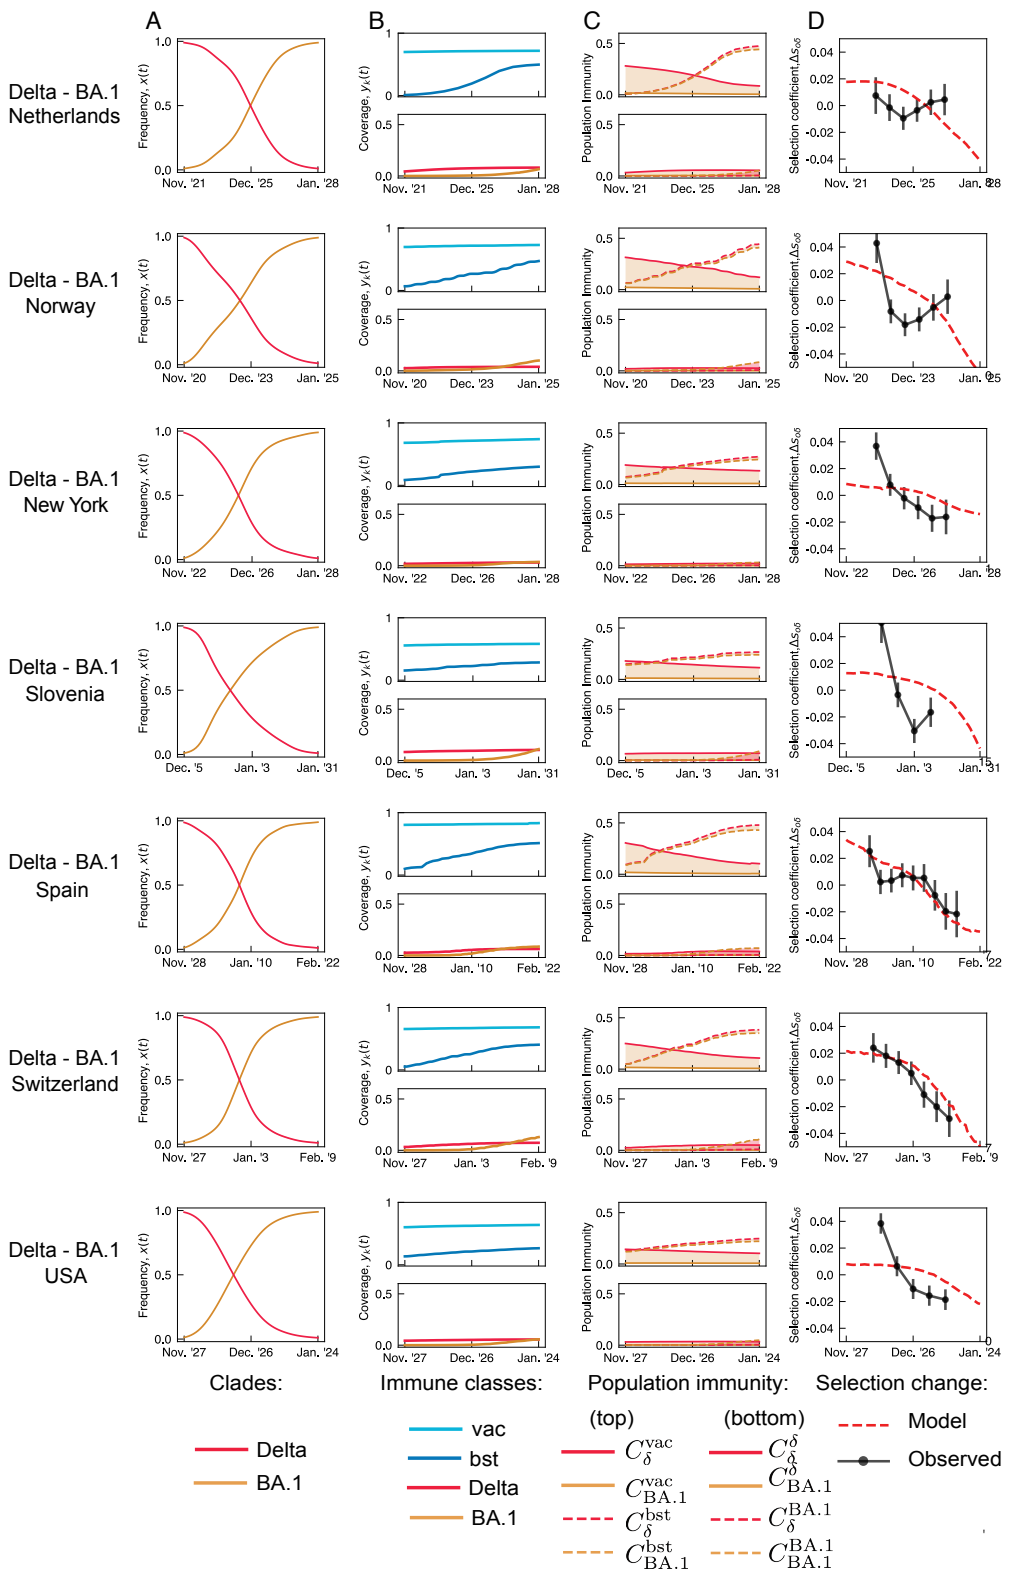

Supplement: NIHMS1936276-supplement-1.pdf [file NIHMS1936276-supplement-1.pdf]

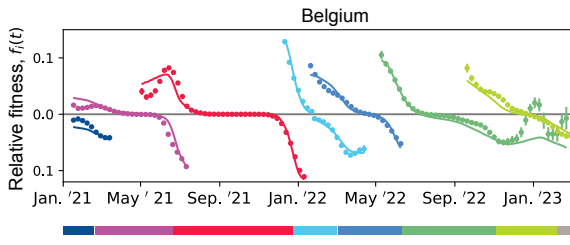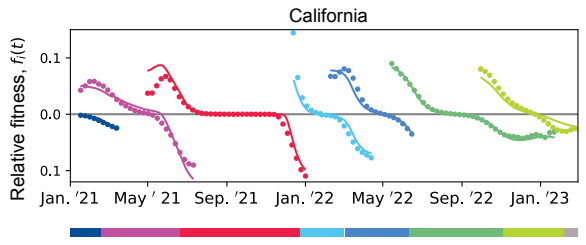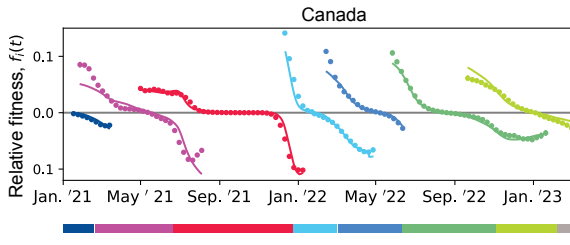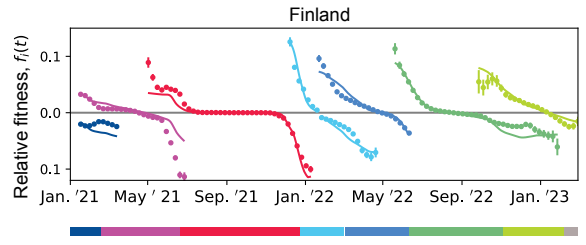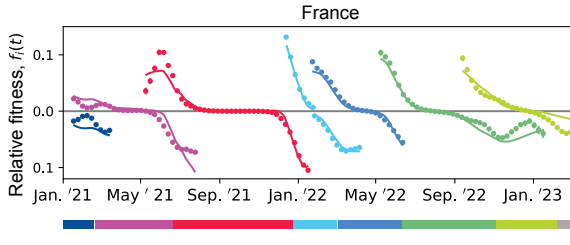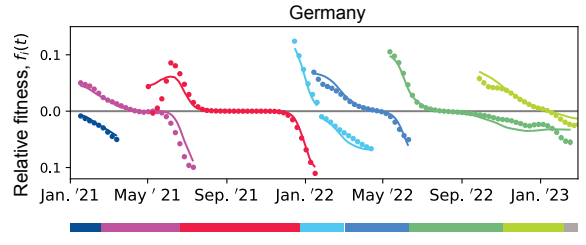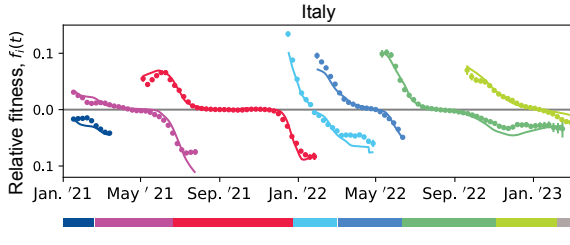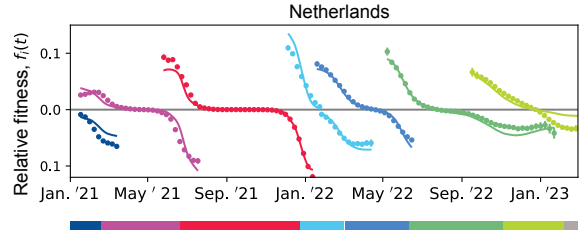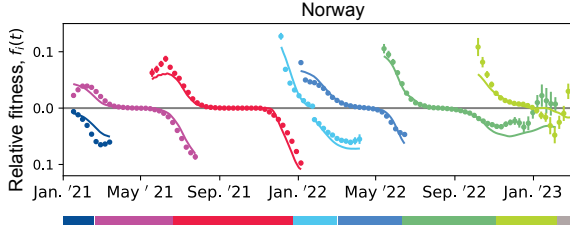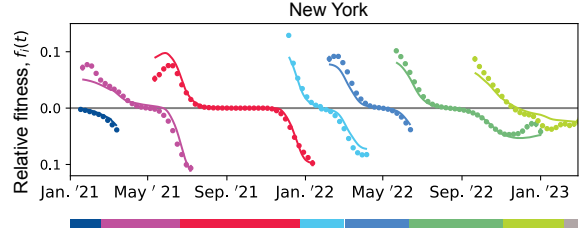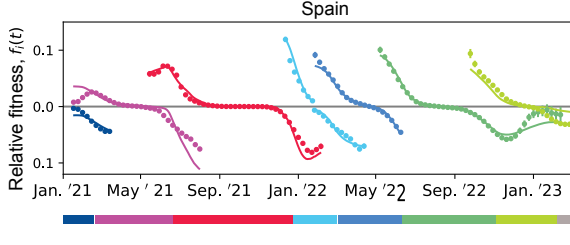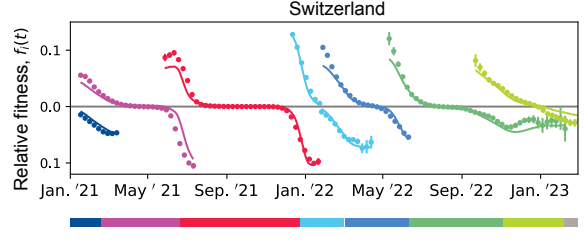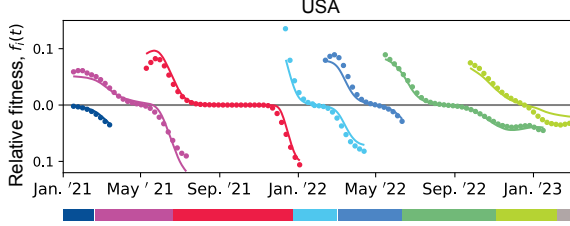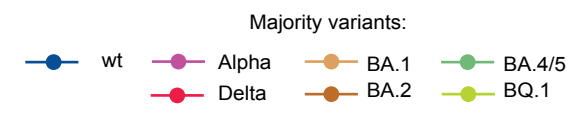

Supplement: NIHMS1936276-supplement-2.pdf [file NIHMS1936276-supplement-2.pdf]

1 - Alpha

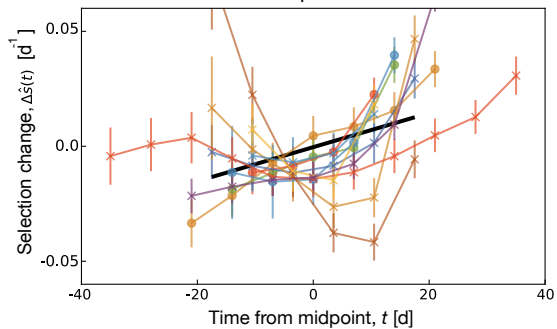

Alpha - Delta

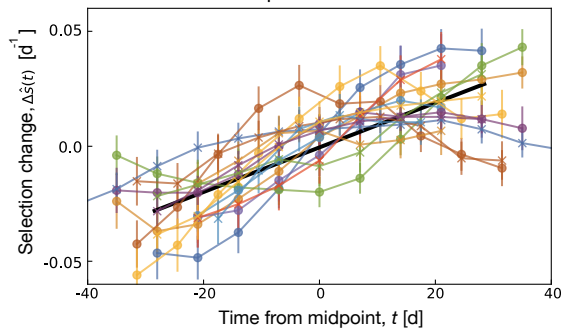

Delta - BA.1

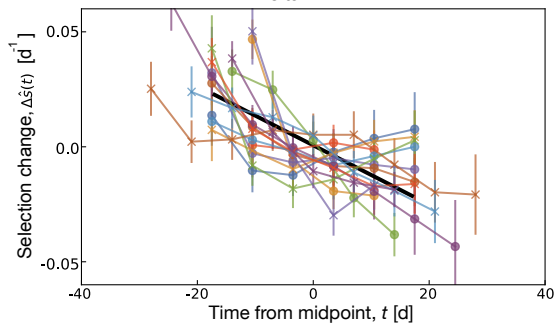

BA.1 - BA.2

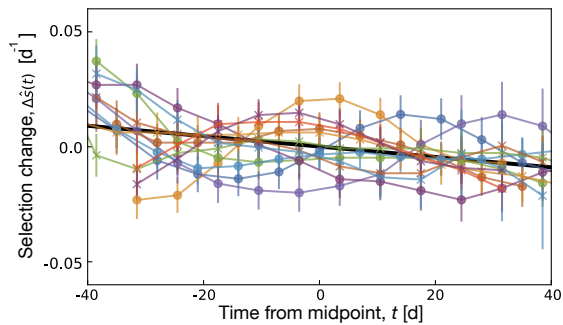

BA.2 - BA.4/5

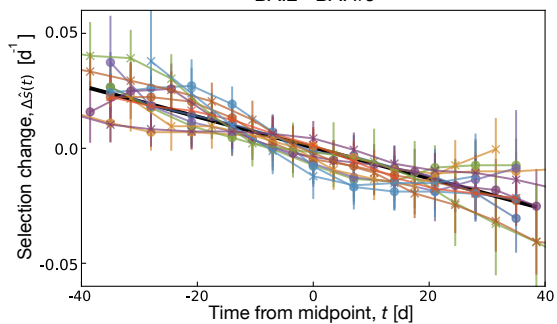

BA.4/5 - BQ.1

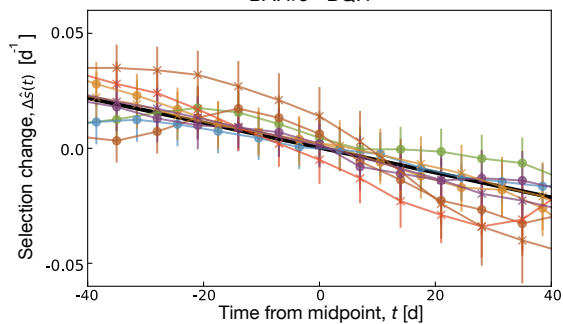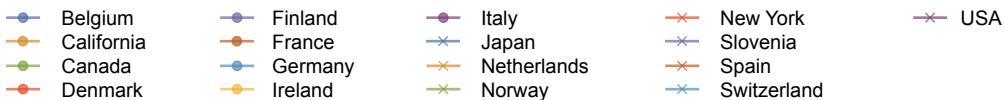

Supplement: NIHMS1936276-supplement-3.pdf [file NIHMS1936276-supplement-3.pdf]

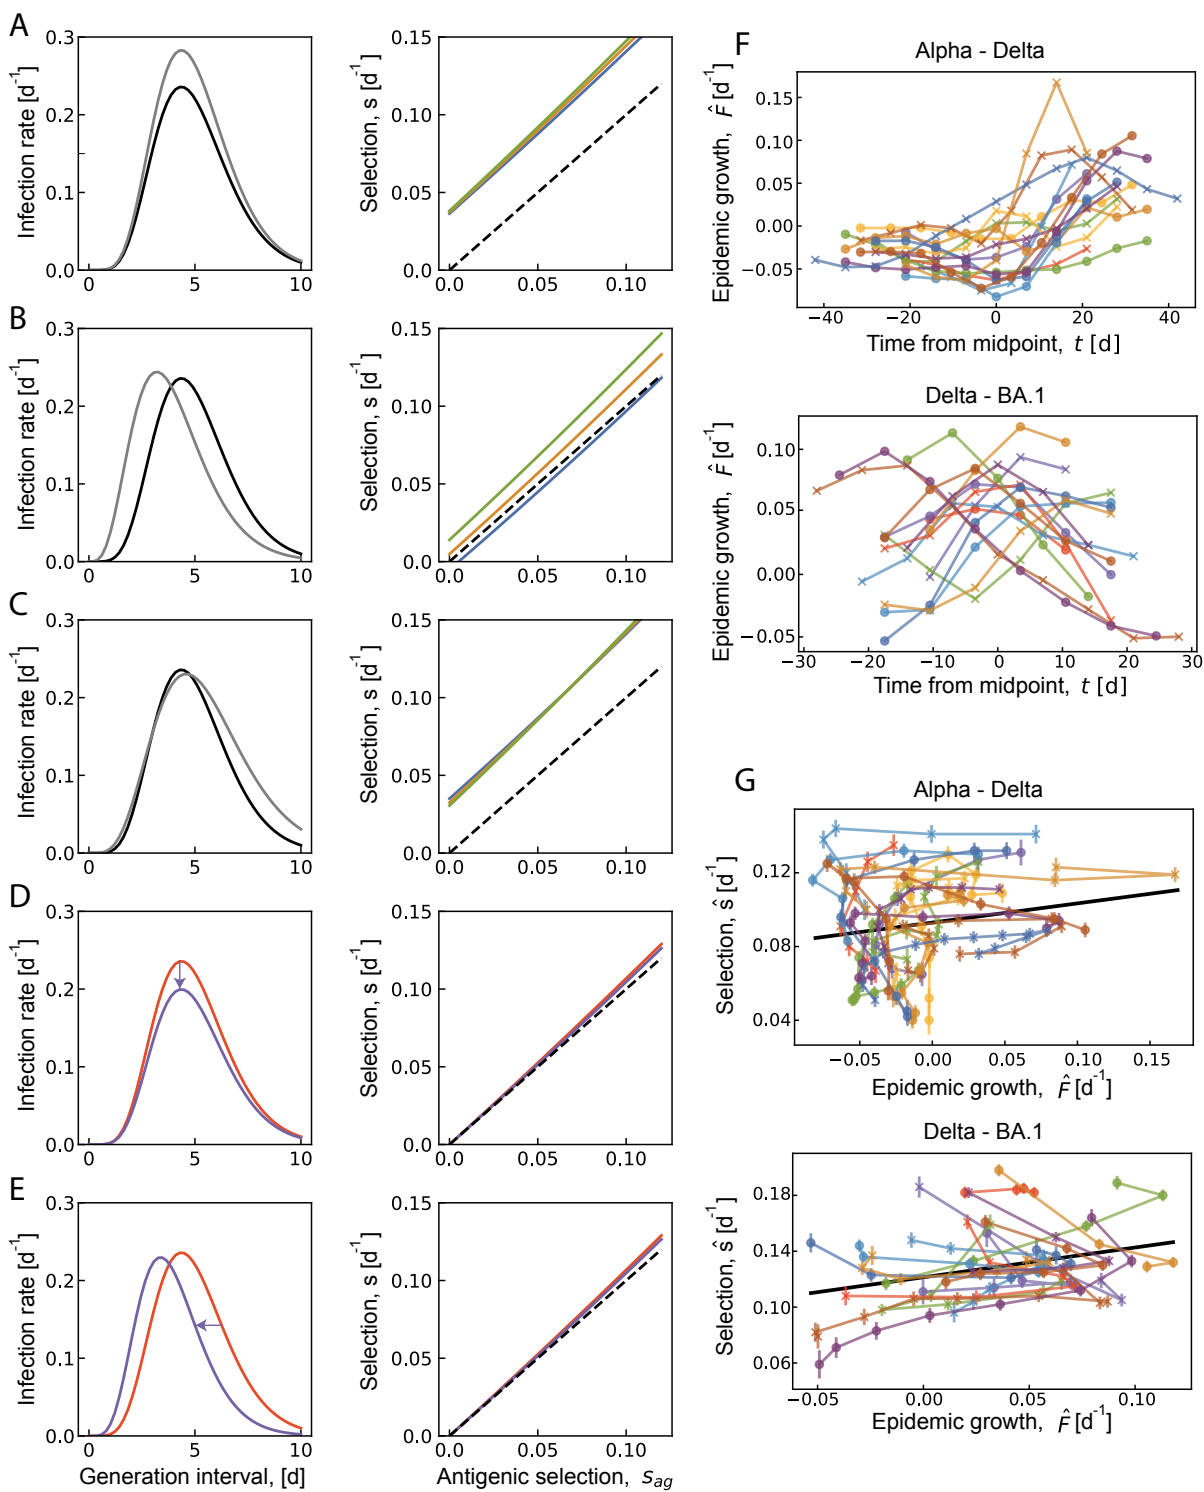

Supplement: NIHMS1936276-supplement-4.pdf [file NIHMS1936276-supplement-4.pdf]
